# Supplementary material
Source: publisher figshare collection journal article supplement (https://acs.figshare.com/ndownloader/files/24786240)
Supplement: Supplementary file 1 [file 24786240]

## Sheet: Fig. 2C
Figure 2 C
Velocity of attraction measured for trajectories of MagEcoli (µm/min)
	Iron condition
Trajectory	4mM	3mM	2mM	1mM
Movie 1
1	4.77623	4.04706	3.52287	2.93934
2	3.95453	4.38263	3.004	3.66432
3	7.25064	3.80711	2.97964	1.26569
4	3.87272	4.11442	3.59606	2.59323
5	4.10789	5.42537	3.38538	2.78419
6	2.46651	3.15634	2.83395	3.11404
7	6.74233	4.04165	3.77488	2.67912
8	7.92353	6.09723	2.28887	2.83331
9	4.94296	4.4418	3.28907	3.38672
10	3.93462	3.84449	2.79299	2.6536
11	4.27123	3.73753	2.9325	2.13032
12	4.14342	3.76272	3.36208	2.82946
13	3.22555	3.79128	3.55934	3.26472
14	5.19149	4.68388	3.49739	2.63465
15	5.30732	3.58125	2.72798	2.88352
16	3.56298	4.20014	3.52349	2.45135
17	6.90642	3.90407	2.48351	2.91368
18	6.28812	3.82827	2.66536	2.1913
19	4.37614	4.08563	2.42814	2.94544
20	4.94112	3.80573	3.13486	2.3481
21	5.44849	4.20162	3.02953	3.71765
22	7.13675	3.65384	3.68874	2.9256
23	5.53987	3.47467	2.61589	2.31886
24	6.35497	3.83673	3.14858	2.24552
25	4.45609	3.29104	3.16131	3.47827
26	4.96873	3.36576	3.9213	2.55541
27	4.97512	4.57296	3.51012	2.18859
28	6.19854	3.14648	2.79856	2.05261
29	7.09528	4.00023	2.64288	2.81183
30	9.26248	3.34217	3.42812	2.90176
Movie 2
1	6.65553	4.12049	3.26725	2.66858
2	7.01526	3.46517	4.00315	3.0171
3	8.68878	2.39385	3.74123	2.80766
4	5.26655	5.02237	2.97423	2.46193
5	3.45125	4.34948	4.18683	2.30764
6	3.97403	3.87622	3.79969	3.41157
7	4.11914	4.20525	3.02456	2.20347
8	3.84185	4.99039	3.30839	1.78031
9	3.94551	3.60969	3.47629	4.44967
10	5.39174	3.40282	3.6903	2.84982
11	5.12486	4.13792	3.17876	3.0877
12	5.15641	5.81432	3.3806	2.7351
13	5.61103	4.06054	5.24515	2.91131
14	7.76903	4.98104	3.45775	3.07804
15	4.78284	4.29952	3.61491	3.22793
16	4.04693	3.5463	3.01082	2.77928
17	7.26132	3.94782	3.46901	3.21391
18	3.46883	3.32545	3.03377	3.1602
19	4.02728	4.18017	4.25176	2.90219
20	7.24767	4.49005	2.83984	2.3905
21	3.04737	4.43381	3.76104	2.89094
22	6.81191	3.61275	4.02375	3.30684
23	6.23836	3.07691	3.33838	3.92354
24	4.10633	3.61155	3.37405	2.69407
25	3.35393	5.30774	3.76836	3.73374
26	3.24629	3.76402	2.82274	3.06767
27	4.36635	5.06412	3.49643	3.22092
28	3.57171	2.88531	4.10188	4.17389
29	6.08628	5.43479	3.54363	2.08077
30	8.54854	5.13848	3.32123	2.52447

## Sheet: Fig. 5D
Figure 5 D
Number of cell nuclei, red E. coli and green MagEcoli counted across the dish (on 4 parallel lines, same dish)
View field	Number of cell nuclei	Number of GFP MagEcoli	Number of mCherry E. coli
Line 1
1	201	8	5
2	372	32	18
3	853	99	63
4	795	145	66
5	877	237	100
6	845	203	103
7	673	272	113
8	492	278	131
9	354	300	102
10	480	483	124
11	591	1039	141
12	487	736	133
13	535	822	113
14	454	842	102
15	601	928	115
16	743	940	132
17	825	323	115
18	597	175	59
19	389	127	31
20	324	81	27
Line 2
1	483	55	25
2	647	116	55
3	734	105	68
4	811	214	87
5	888	153	89
6	851	265	92
7	783	778	128
8	818	802	107
9	648	607	114
10	529	677	91
11	469	680	83
12	529	804	93
13	570	702	84
14	479	213	62
15	412	107	39
16	366	63	28
17	244	99	17
18	20	9	2
Line 3
1	539	42	30
2	674	159	54
3	781	169	76
4	938	224	82
5	812	318	108
6	765	295	107
7	541	305	111
8	341	301	124
9	393	552	110
10	503	911	137
11	528	686	146
12	469	886	144
13	475	964	157
14	547	749	128
15	650	603	126
16	677	344	107
17	548	304	98
18	662	255	81
19	841	257	83
20	210	50	24
Line 4
1	267	24	10
2	656	61	34
3	682	105	57
4	535	126	46
5	726	192	81
6	735	174	71
7	769	642	102
8	830	893	89
9	717	614	133
10	481	710	75
11	493	566	90
12	478	684	76
13	496	656	71
14	515	255	49
15	363	86	26
16	303	54	27
